# Supplementary material for: A novel scaling methodology to reduce the biases associated with missing data from commercial activity monitors
Source: PubMed Central journal article supplement (PMC7313747; doi:10.1371/journal.pone.0235144), 2020-06-24

## Simulation study 1

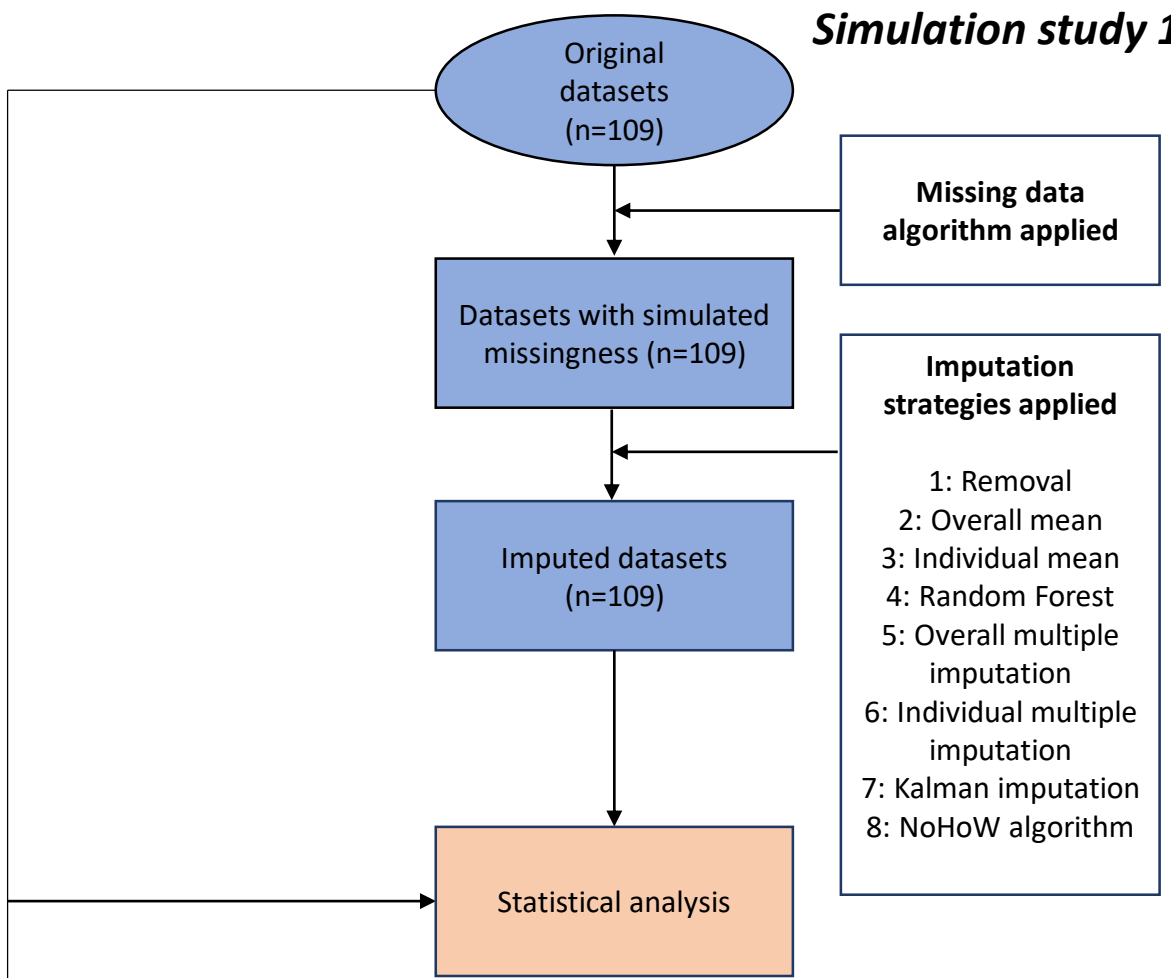

## Simulation study 2

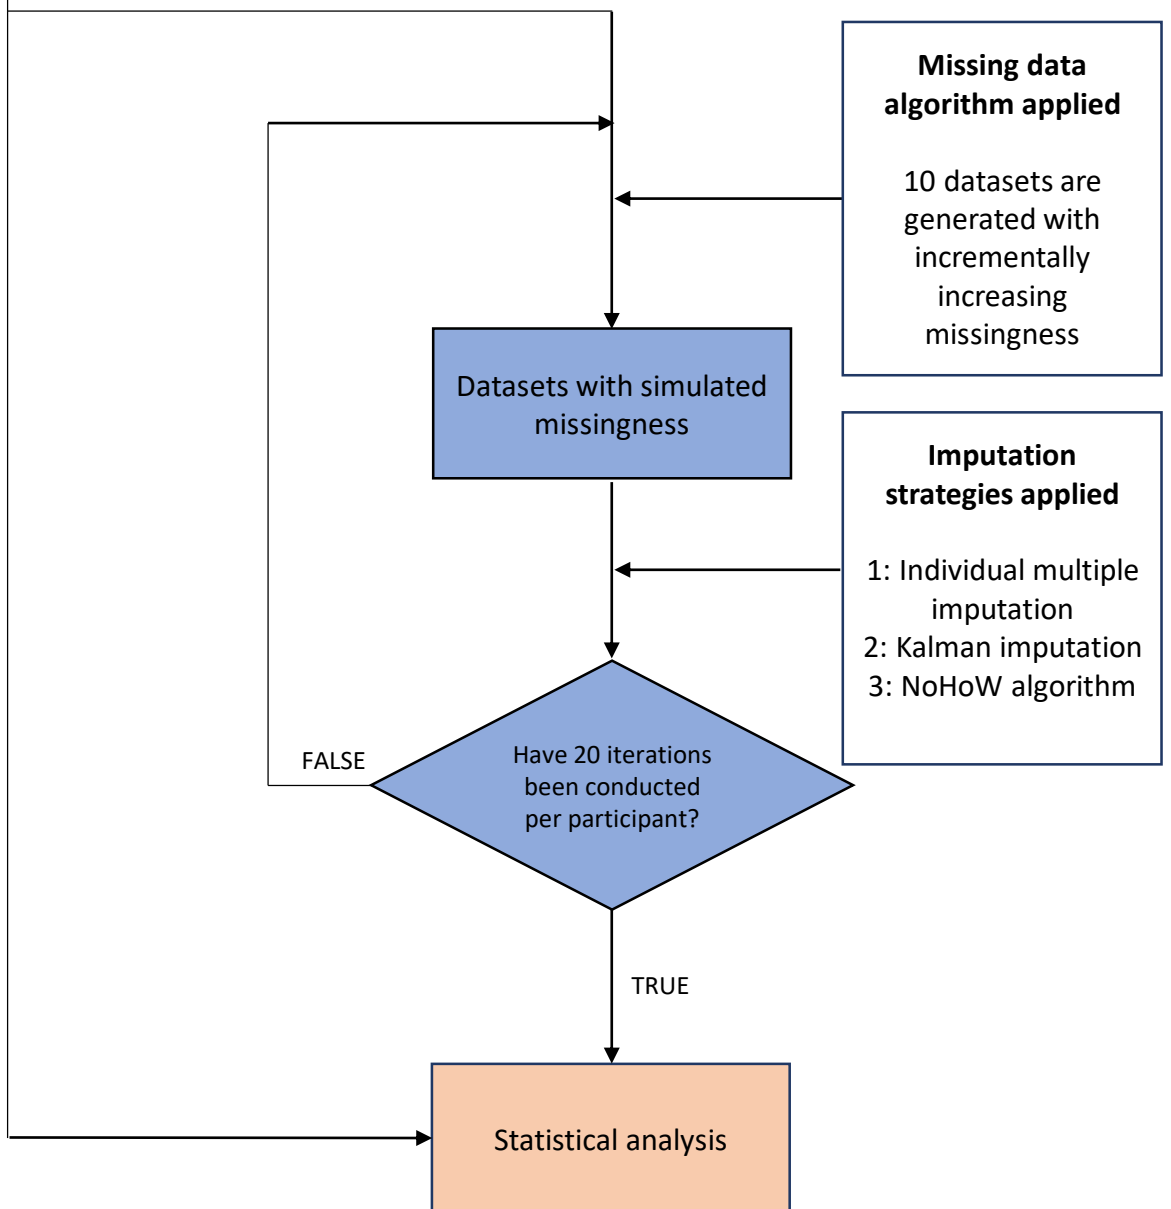

Supplement: pone.0235144.s004.pdf [file pone.0235144.s004.pdf]
